# Supplementary material for: Relative Telomere Length Is Associated With Age-Related Macular Degeneration in Women
Source: PubMed Central journal article supplement (PMC9150829; doi:10.1167/iovs.63.5.30), 2022-05-25
Supplement: iovs-63-5-30_s001.pdf [file iovs-63-5-30_s001.pdf]

1 Supplemental Material for

2 **Relative telomere length is associated with**

3 **age-related macular degeneration in women**

4 Adriana Koller <sup>1</sup>, Caroline Brandl <sup>2,3</sup>, Claudia Lamina <sup>1</sup>, Martina E. Zimmermann <sup>2</sup>, Monika Summerer <sup>1</sup>,  
5 Klaus J. Stark <sup>2</sup>, Reinhard Würzner <sup>4</sup>, Iris M. Heid <sup>2</sup>, Florian Kronenberg <sup>1</sup>

6  
7 <sup>1</sup> Institute of Genetic Epidemiology, Medical University of Innsbruck, Innsbruck, Austria

8 <sup>2</sup> Department of Genetic Epidemiology, University of Regensburg, Regensburg, Germany

9 <sup>3</sup> Department of Ophthalmology, University Hospital Regensburg, Regensburg, Germany

10 <sup>4</sup> Institute of Hygiene and Medical Microbiology, Medical University of Innsbruck, Innsbruck, Austria

## 11 SUPPLEMENTARY METHODS

### 12 ***Study Population***

13 The ongoing AugUR study includes over 2,400 probands from the mobile elderly population of  
14 Regensburg with at least 70 years of age. For the baseline investigation of the AugUR study, a random  
15 sample from the local population registries of residence was invited via mail. Of the 13,522 individuals  
16 who received a study invitation via mail, 5,351 responded and of those, 2,449 participated in the  
17 AugUR study (response rate=39.6%, participation rate=18.1%). Reasons for non-participation were  
18 being too sick, lack of time, no interest in participating or others (Supplementary Figure S1). No a priori  
19 exclusion criteria were defined. Those interested in participating in the study were contacted and an  
20 appointment was made. All participants came to the study center and were mentally and physically  
21 mobile to conduct the protocol (face-to-face interview, blood draw and further medical and  
22 ophthalmological investigations). The recruitment of participants has taken place between 2013 and  
23 2019. Relative telomere length measurements were performed in May 2021 in DNA collected at the  
24 time of the baseline and ophthalmological investigation.

25 During the first medical interview, information on sociodemographic data, lifestyle factors, metabolic  
26 parameters, medication use, general comorbidities and ocular comorbidities, e.g., cataract, glaucoma  
27 and diabetic retinopathy was collected. In addition to the detailed ophthalmological investigations and  
28 medical interviews, both, blood and urine samples were collected.<sup>1,2</sup>

### 29 **Variable ascertainment and definitions**

30 Smoking status was obtained as current smoker ( $\geq 1$  cigarette per month), ex-smokers (quitted smoking  
31 at least a month ago) and never smokers (smokes  $< 100$  cigarettes in their lifetime). All lipid blood  
32 parameters were assessed under non-fasting conditions. Hypertension was defined by systolic blood  
33 pressure  $\geq 140$  mmHg and/or diastolic blood pressure  $\geq 90$  mmHg and/or the use of antihypertensive  
34 drugs. Diabetes status was based on self-reported diabetes and additional diabetes medication.  
35 Cardiovascular disease was defined as a history of myocardial infarctions, stroke and/or presence of  
36 coronary stents or bypass. The estimated glomerular filtration rate was calculated based on the 2009  
37 CKD-EPI equation.<sup>3</sup> Information on extreme light exposure was gathered in a questionnaire asking  
38 whether the participants were working predominantly outdoors or exposed to extreme light at age 30  
39 to 50 years. Finally, general fitness was assessed using hand grip strength (Jamar Plus+ Digital Hand  
40 Dynamometer; Patterson Medical, Warrenville, IL, USA). Each hand was tested three times and the  
41 maximum value of the six measurements (in kg) was analyzed.

42 **DNA extraction**

43 It has been described previously that the method of DNA extraction greatly influences the results of  
44 relative telomere length (RTL) measurements<sup>4,5</sup> The DNA extraction of the first 959 samples was done  
45 using the protocol and reagents from Puregene (Qiagen, Hilden, Germany). However, due to high  
46 fluctuations in DNA concentrations and narrow yield in this elderly cohort, the procedure for the  
47 remaining 1,442 samples changed to another, however, very similar salting out method. Here, all  
48 buffers were manually prepared. DNA concentration and purity were checked using a Tecan Infinite  
49 M200pro (Tecan Group Ltd., Männedorf, Switzerland) and diluted with water to a final concentration  
50 of 20 ng/μl. To investigate whether the slightly different DNA extraction methods influence the  
51 measurements of the RTL, DNAs from 20 whole blood samples were extracted with both methods.  
52 However, these results correlated perfectly (correlation coefficient=0.96, p<0.001) and therefore, both  
53 subsets in the AugUR study were analyzed as one cohort.

54 **Relative telomere length measurements**

55 In contrast to the previously used singleplex method, using a multiplex approach allows the  
56 amplification and detection of both products, the telomere product and the single-copy gene product  
57 (albumin), within one run. Therefore, this approach reduces the error-proneness, is cheaper and less  
58 time-consuming.<sup>6,7</sup> Primers were designed by Cawthon *et al.*<sup>6</sup> with an update received by personal  
59 communication with the author and synthesized by Microsynth AG (Balgach, Switzerland). Exact  
60 primer sequences starting with 5' were

- 61 • telg (ACACTAAGGTTTGGGTTTGGGTTTGGGTTTGGGTTAGTGT),
- 62 • telc (TGTTAGGTATCCCTATCCCTATCCCTATCCCTATCCCTAACA),
- 63 • albugcr1 (CGGCGGCGGGCGGCGGGCTGGGCGGAAACGCTGCGCAGAATCCTTG) and
- 64 • albdgcr1 (GCCC GCCCGCCGCGCCCGTCCCGCCGCTGAAAAGTACGGTCGCCTG).

65 The cycling profile was optimized to improve efficiencies: 1x stage one (95°C, 15 min), 2x stage two  
66 (94°C for 15 sec, 49°C for 15 sec), 40x stage three (94°C for 15 sec, 68°C for 10 sec, 74°C for 15 sec with  
67 signal acquisition, 82°C for 10 sec, 88°C for 15 sec with signal acquisition). A melting curve (59-95 °C  
68 with 5 seconds per step, 0.5 °C each) was included after each run.

69 To investigate the efficiency of the assay, a three-fold serial dilution with five different concentrations  
70 was prepared starting with a concentration of 60 ng. For the standard curve, the same conditions as in  
71 the final assay were chosen, however, reactions were performed in quadruplicates instead of  
72 triplicates. Efficiencies above 90 % for both targets were detected. Each 10 μl reaction contained 1 μl  
73 DNA (20 ng), 5 μl PowerUp™ SYBR™ Green Master Mix (Thermo Fisher Scientific, Waltham, MA, USA),

74 700 nM telomere primers each as well as 400 nM albumin primers each. All qPCR reactions were run  
75 on a Quantstudio 6 flex system (Software 1.7.1, Thermo Fisher Scientific, Waltham, MA, USA).

76 Before calculation, the efficiency correction method<sup>8</sup> was applied on the raw data for each well to  
77 calculate an individual PCR efficiency using the software LinRegPCR<sup>9</sup> for both targets individually. Using  
78 the three efficiencies and Ct values per sample and per product (telomere or albumin), a coefficient of  
79 variation below 5% was set as a requirement to keep the sample. Next, the mean of the triplicates for  
80 each sample was calculated. To determine the relative T/S ratio that reflects the difference between  
81 the samples normalized to the standard, the following formula was chosen to calculate the fraction  
82 efficiency (eff) of the samples to the Ct value of the samples over the fraction of the efficiency of the  
83 calibrator to the Ct value of the calibrator. With this method, the relative telomere length is  
84 determined via the ratio between the telomere content and the nuclear reference gene content.

$$85 \quad \text{Relative T/S Ratio} = \frac{\text{eff}(\text{tel, sample})^{\text{Ct}(\text{tel, sample})}}{\text{eff}(\text{alb, sample})^{\text{Ct}(\text{alb, sample})}} / \frac{\text{eff}(\text{tel, calibrator})^{\text{Ct}(\text{tel, calibrator})}}{\text{eff}(\text{alb, calibrator})^{\text{Ct}(\text{alb, calibrator})}}$$

86 For calculation of the T/S ratio, an intern control was chosen as a calibrator, defined as T/S ratio=1. All  
87 other T/S ratios were calculated based on the calibrator and therefore, for each sample a ratio larger  
88 (>1) or smaller (<1) than the one of the calibrator was determined. Four different positive controls  
89 were included as additional references: a manufactured DNA (commercially available DNA; Human  
90 Genomic DNA, Roche, Merck KGaA, Darmstadt, Germany) and three control samples used for  
91 comparison of the inter-assay variability. These four positive controls were included on all plates and  
92 their T/S ratios were compared for the entire study after finishing all measurements. To avoid bias of  
93 the calibrator, a plate correction factor was used in order to correct the T/S ratios for variability in the  
94 calibrator in plates where all four positive controls show a variability over 10%. After completing all  
95 runs in the study, the T/S ratios of all positive controls were compared and finally the plate correction  
96 factor was used in three of the twenty-six independent experiments. An inter-assay variability below  
97 5% was determined for each of the four positive controls over the entire study.

#### 98 **Power calculation**

99 *A priori* power calculations for a logistic regression model were performed based on the sample size  
100 available in the AugUR study (Supplementary Figure S2). The minimally detectable odds ratios are  
101 given per standard deviation difference of a normal distributed standardized variable. Since RTL is  
102 correlated with age, the power calculations are given once for "no adjustment for age" and once for  
103 "with adjustment for age" assuming a correlation with age of  $r^2 = 0.60$  in the worst case.

104 ***Sensitivity analyses***

105 Sensitivity analyses for the entire cohort but also stratified for men and women are provided in  
106 Supplementary Table S4. Since the age distribution was different for individuals with and without AMD,  
107 we performed a further sensitivity analysis by additionally adjusting not only for age but also for (age-  
108 median age)<sup>2</sup> and (age-median age)<sup>3</sup> in each model. No changes in the  $\beta$ -estimates or the significance  
109 were detected.

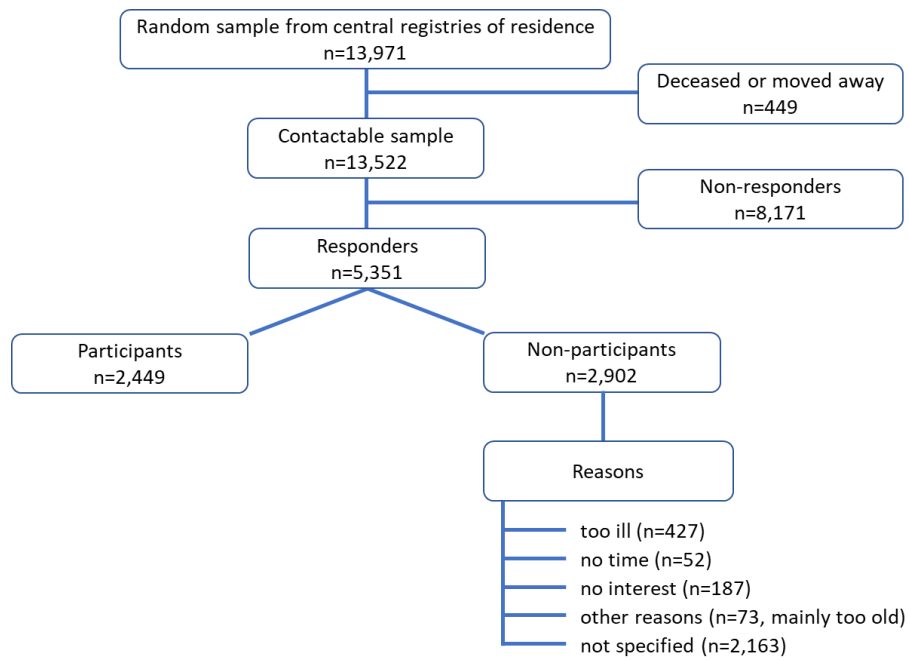

110

111 **Supplementary Figure S1:** Schematic overview of AugUR study recruitment phase from first contact to  
 112 final participation at the baseline.

113

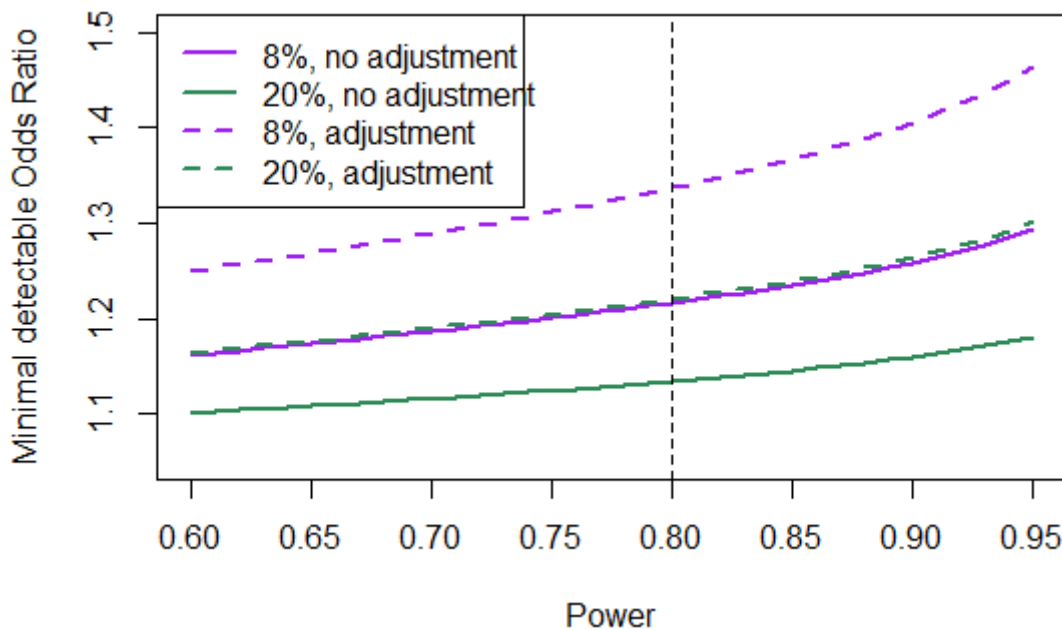

114

115 **Supplementary Figure S2:** *A priori* power calculation based on the observed prevalence of 8% for late  
 116 AMD and 20% for early AMD according to the Three-Continent classification. The minimally detectable  
 117 odds ratios are given per standard deviation difference of a normal distributed standardized variable  
 118 and shown with (dashed lines) and without adjustment (solid line).

119

120 **Supplementary Table S1:** Baseline characteristics of individuals without AMD, with early AMD  
 121 (according to Three Continent AMD Consortium Severity Scale) and participants with late AMD  
 122 (n=2,262).

|                                              | <b>No AMD<br/>(n=1,635)</b>     | <b>Early AMD<br/>(n=455)</b>    | <b>Late AMD<br/>(n=172)</b>     | <b>P-<br/>value</b> |
|----------------------------------------------|---------------------------------|---------------------------------|---------------------------------|---------------------|
| Sex, n (% male)                              | 796 (48.7%)                     | 200 (44.0%)                     | 81 (47.1%)                      | 0.20                |
| Age (years)                                  | 77.6±4.7<br>[74.0; 76.8; 80.6]  | 79.2±5.1<br>[75.2; 78.6; 82.6]  | 81.9±5.7<br>[77.7; 81.6; 86.4]  | <b>&lt;0.001</b>    |
| Smoking n (%)                                |                                 |                                 |                                 | 0.11                |
| Current                                      | 90 (5.5%)                       | 20 (4.4%)                       | 16 (9.4%)                       |                     |
| Former                                       | 644 (39.5%)                     | 173 (38.2%)                     | 57 (33.5%)                      |                     |
| Never                                        | 897 (55.0%)                     | 260 (57.4%)                     | 97 (57.1%)                      |                     |
| Body Mass Index<br>(kg/m <sup>2</sup> )      | 27.7±4.5<br>[24.7; 27.2; 30.4]  | 27.6±4.7<br>[24.8; 27.0; 29.8]  | 28.1±4.4<br>[25.4; 27.7; 30.3]  | 0.57                |
| Diabetes Mellitus, n (%)                     | 334 (20.4%)                     | 83 (18.2%)                      | 43 (25.0%)                      | 0.17                |
| Waist-hip ratio                              | 0.95±0.09<br>[0.89; 0.95; 1.01] | 0.94±0.09<br>[0.88; 0.94; 1.00] | 0.96±0.09<br>[0.90; 0.96; 1.02] | 0.06                |
| Alcohol (g per day)                          | 10.1 ±12.4                      | 9.8±10.6                        | 8.1±10.0                        | 0.12                |
| Extreme light exposure<br>in the past, n (%) | 122 (7.5%)                      | 27 (6.0%)                       | 12 (7.1%)                       | 0.54                |
| Triglycerides (mg/dl)                        | 160±84<br>[102;140;195]         | 148±84<br>[92;129;183]          | 160±92<br>[97;142;187]          | <b>0.04</b>         |
| LDL cholesterol (mg/dl)                      | 142±35<br>[116; 141; 164]       | 140±34<br>[116; 139; 162]       | 139±35<br>[115; 140; 163]       | 0.43                |
| HDL cholesterol (mg/dl)                      | 60.7±15.2<br>[49.6; 59.0;69.8]  | 63.6±16.6<br>[52.1; 61.7;72.7]  | 59.5±15.1<br>[47.7; 58.7;68.9]  | <b>&lt;0.001</b>    |
| Total cholesterol (mg/dl)                    | 218±46<br>[185; 218; 248]       | 218±48<br>[186; 216; 249]       | 218±45<br>[184; 216; 249]       | 0.75                |
| C-reactive protein<br>(mg/dl)*               | 0.43±0.56<br>[0.21;0.21; 0.42]  | 0.43±0.71<br>[0.21;0.21; 0.41]  | 0.57±0.98<br>[0.21;0.21; 0.59]  | <b>0.008</b>        |
| HbA <sub>1c</sub> (mmol/mol)                 | 39.9±7.3<br>[35.5; 38.4; 42.1]  | 38.9±6.8<br>[34.5; 37.7; 41.0]  | 41.2±9.4<br>[35.5; 38.8; 45.4]  | <b>0.003</b>        |
| eGFR (mL/min/1.73m <sup>2</sup> )            | 68.7±15.9                       | 67.2±16.0                       | 63.1±20.4                       | <b>&lt;0.001</b>    |
| Systolic blood pressure<br>(mmHg)            | 132±18<br>[119; 131; 143]       | 131±18<br>[119; 130; 141]       | 133±18<br>[121; 132; 144]       | 0.46                |
| Diastolic blood pressure<br>(mmHg)           | 77±11<br>[70; 77; 84]           | 75±10<br>[68; 75; 82]           | 76±10<br>[69; 76; 82]           | <b>0.016</b>        |
| Hypertension, n (%) †                        | 1178 (72.1%)                    | 326 (71.8%)                     | 132 (76.7%)                     | 0.41                |
| Cardiovascular disease,<br>n (%) ‡           | 345 (21.3%)                     | 87 (19.3%)                      | 53 (31.0%)                      | <b>0.006</b>        |
| Medication intake, n (%)                     | 1576 (96.6%)                    | 439 (97.1%)                     | 168 (98.2%)                     | 0.45                |
| Hand grip strength (in<br>kg)                | 30.7±9.9<br>[23.0; 28.8; 38.3]  | 29.5±9.8<br>[22.1; 27.1; 36.7]  | 27.7±8.6<br>[21.3; 24.9; 33.7]  | <b>&lt;0.001</b>    |
| Relative telomere length                     | 0.91±0.18<br>[0.78/0.90/1.03]   | 0.88±0.17<br>[0.76/0.87;0.99]   | 0.86±0.17<br>[0.74/0.83/0.97]   | <b>&lt;0.001</b>    |

123 Abbreviations: AMD = age-related macular degeneration, LDL = low-density lipoprotein, HDL = high-density lipoprotein, CRP = C-reactive  
 124 protein, eGFR = estimated glomerular filtration rate

125 Mean ± standard deviation [25th, 50th and 75th percentile] or number (%).

126 \* CRP has a lower detection limit (LOD) of <0.3, which was replaced by the value = LOD/sqrt(2)

127 † Hypertension was defined by systolic blood pressure ≥140 mmHg and/or diastolic blood pressure ≥90 mmHg and/or the use of  
 128 antihypertensive drugs.

129 ‡ Cardiovascular disease was defined as a history of myocardial infarctions, stroke and/or presence of coronary stents or bypass.

130 **Supplementary Table S2:** Predicted probabilities with 95% confident intervals (CI) of no age-related  
 131 macular degeneration (AMD) (n=1,635), early AMD (n=455) or late AMD (n=172), given a specific  
 132 relative telomere length (adjusted for age and sex).

| RTL         | No AMD                |           | Early AMD             |           | Late AMD              |           |
|-------------|-----------------------|-----------|-----------------------|-----------|-----------------------|-----------|
|             | Predicted Probability | 95% CI    | Predicted Probability | 95% CI    | Predicted Probability | 95% CI    |
| <b>0.40</b> | 0.65                  | 0.58-0.71 | 0.26                  | 0.21-0.33 | 0.09                  | 0.05-0.13 |
| <b>0.80</b> | 0.72                  | 0.70-0.74 | 0.21                  | 0.19-0.23 | 0.07                  | 0.06-0.08 |
| <b>1.20</b> | 0.78                  | 0.74-0.81 | 0.17                  | 0.14-0.20 | 0.05                  | 0.04-0.07 |
| <b>1.60</b> | 0.83                  | 0.76-0.88 | 0.13                  | 0.09-0.19 | 0.04                  | 0.02-0.07 |

133



|                                                  | <b>women<br/>(n = 1,185)</b>   | <b>men<br/>(n = 1,077)</b>     | <b>P-value</b> |
|--------------------------------------------------|--------------------------------|--------------------------------|----------------|
| <b>AMD status, n (%)</b>                         |                                |                                | 0.20           |
| <b>No AMD</b>                                    | 839 (70.8%)                    | 796 (73.9%)                    |                |
| <b>Early AMD</b>                                 | 255 (21.5%)                    | 200 (18.6%)                    |                |
| <b>Late AMD</b>                                  | 91 (7.7%)                      | 81 (7.5%)                      |                |
| <b>Age (years)</b>                               | 78.4±5.0<br>[74.6; 77.7; 81.6] | 78.2±5.1<br>[74.3; 77.2; 81.2] | 0.39           |
| <b>Smoking status, n (%)</b>                     |                                |                                | <0.001         |
| <b>Current</b>                                   | 55 (4.7%)                      | 71 (6.6%)                      |                |
| <b>Former</b>                                    | 285 (24.1)                     | 589 (54.9)                     |                |
| <b>Never</b>                                     | 841(71.2%)                     | 413 (38.5%)                    |                |
| <b>Body Mass Index (kg/m<sup>2</sup>)</b>        | 27.6±5.0<br>[24.1; 27.0; 30.4] | 27.8±3.<br>[25.2; 27.4; 30.1]  | 0.30           |
| <b>Alcohol (g per day)</b>                       | 6.2±7.8                        | 13.9 ±14.1                     | <0.001         |
| <b>Extreme light exposure in the past, n (%)</b> | 8 (0.7%)                       | 153 (16.6%)                    | <0.001         |
| <b>Triglycerides (mg/dl)</b>                     | 153±79<br>[98;137;183]         | 163±91<br>[100;140;199]        | 0.01           |
| <b>LDL cholesterol (mg/dl)</b>                   | 148.1±34.8<br>[123; 147; 169]  | 133.9±33.6<br>[109; 133; 154]  | <0.001         |
| <b>HDL cholesterol (mg/dl)</b>                   | 66.4±15.1<br>[55.8; 65.3;75.7] | 55.4±13.7<br>[45.8; 54.1;62.6] | <0.001         |
| <b>Total cholesterol (mg/dl)</b>                 | 230.8±45.0<br>[199; 231; 258]  | 203.7±42.4<br>[172; 202; 231]  | <0.001         |
| <b>HbA<sub>1c</sub> (mmol/mol)</b>               | 39.8±7.4<br>[35.5; 38.5; 41.8] | 39.8±7.4<br>[35.5; 37.7; 42.1] | 0.83           |
| <b>eGFR (mL/min/1.73m<sup>2</sup>)</b>           | 68.0±16.5                      | 67.8±16.2                      | 0.83           |
| <b>Systolic blood pressure (mmHg)</b>            | 130±18                         | 133±17                         | <0.001         |
| <b>Diastolic blood pressure (mmHg)</b>           | 76±11                          | 76±11                          | 0.68           |
| <b>Hypertension, n (%)</b>                       | 850 (71.9%)                    | 786 (73.0%)                    | 0.53           |
| <b>Diabetes Mellitus, n (%)</b>                  | 225 (19.0%)                    | 235 (21.8%)                    | 0.10           |
| <b>Cardiovascular disease, n (%)</b>             | 154 (13.1%)                    | 331 (31.1%)                    | <0.001         |
| <b>Hand grip strength (in kg)</b>                | 23.1±5.0<br>[20.1; 23.0; 26.1] | 38.1±7.5<br>[33.3; 38.1; 43.2] | <0.001         |
| <b>Relative telomere length</b>                  | 0.91±0.19<br>[0.78/0.90;1.02]  | 0.89±0.17<br>[0.76/0.88/1.01]  | 0.003          |

136 **Supplementary Table S4:** Additional sensitivity analyses for the logistic regression analysis  
 137 investigating the association of RTL (decrease by 0.1 units) and AMD for entire study sample (n=2,262),  
 138 women (n=1,185) and men (n=1,077) separately using different adjustment variables.

| Relative telomere length                                 | All (n=2,262)           |              | Women (n=1,185)         |                  | Men (n=1,077)           |             |
|----------------------------------------------------------|-------------------------|--------------|-------------------------|------------------|-------------------------|-------------|
|                                                          | OR (95% CI)             | P-value      | OR (95% CI)             | P-value          | OR (95% CI)             | P-value     |
| <b>Model 4*</b> (adjusted for age, sex, current smoking) | <b>1.08 (1.02-1.14)</b> | <b>0.007</b> | <b>1.14 (1.05-1.22)</b> | <b>&lt;0.001</b> | <b>1.01 (0.93-1.10)</b> | <b>0.76</b> |
| as model 4 plus alcohol intake                           | 1.08 (1.02-1.14)        | 0.009        | 1.13 (1.05-1.22)        | <0.001           | 1.01 (0.93-1.10)        | 0.78        |
| as model 4 plus extreme light exposure                   | 1.08 (1.02-1.14)        | 0.008        | 1.13 (1.05-1.22)        | <0.001           | 1.01 (0.93-1.10)        | 0.80        |
| as model 4 plus total cholesterol                        | 1.07 (1.02-1.14)        | 0.013        | 1.13 (1.05-1.23)        | 0.001            | 1.00 (0.92-1.09)        | 0.96        |
| as model 4 plus triglycerides                            | 1.07 (1.01-1.13)        | 0.019        | 1.13 (1.04-1.22)        | 0.003            | 1.01 (0.93-1.10)        | 0.86        |
| as model 4 plus HDL-cholesterol                          | 1.07 (1.01-1.13)        | 0.018        | 1.13 (1.05-1.22)        | 0.002            | 1.00 (0.92-1.09)        | 0.92        |
| as model 4 plus LDL-cholesterol                          | 1.07 (1.01-1.14)        | 0.016        | 1.13 (1.05-1.23)        | 0.001            | 1.00 (0.91-1.08)        | 0.91        |
| as model 4 plus eGFR                                     | 1.08 (1.02-1.14)        | 0.008        | 1.13 (1.05-1.22)        | 0.001            | 1.01 (0.93-1.10)        | 0.75        |
| as model 4 plus leukocyte count                          | 1.08 (1.01-1.14)        | 0.011        | 1.13 (1.05-1.22)        | 0.002            | 1.01 (0.90-1.07)        | 0.74        |
| as model 4 plus systolic blood pressure                  | 1.08 (1.02-1.14)        | 0.007        | 1.14 (1.06-1.23)        | <0.001           | 1.01 (0.93-1.10)        | 0.85        |
| as model 4 plus diastolic blood pressure                 | 1.07 (1.01-1.13)        | 0.007        | 1.14 (1.06-1.23)        | <0.001           | 1.00 (0.92-1.09)        | 0.93        |
| as model 4 plus HbA <sub>1c</sub>                        | 1.08 (1.01-1.13)        | 0.016        | 1.13 (1.04-1.22)        | 0.002            | 1.01 (0.93-1.10)        | 0.87        |
| as model 4 plus cardiovascular disease                   | 1.08 (1.01-1.13)        | 0.006        | 1.13 (1.05-1.22)        | 0.001            | 1.02 (0.94-1.11)        | 0.62        |
| as model 4 plus hand grip strength                       | 1.08 (1.03-1.15)        | 0.004        | 1.14 (1.06-1.23)        | <0.001           | 1.02 (0.94-1.10)        | 0.71        |

139 \*Model 4 is based on the logistic regression analyses presented in Table 2 of the main manuscript.

140 **References**

- 141 1. Stark K, Olden M, Brandl C, et al. The German AugUR study: study protocol of a prospective  
142 study to investigate chronic diseases in the elderly. *BMC Geriatr* 2015;15:130.
- 143 2. Brandl C, Zimmermann ME, Günther F, et al. On the impact of different approaches to classify  
144 age-related macular degeneration: Results from the German AugUR study. *Sci Rep* 2018;8(1):8675.
- 145 3. Levey AS, Stevens LA, Schmid CH, et al. A new equation to estimate glomerular filtration rate.  
146 *Ann Intern Med* 2009;150(9):604-12.
- 147 4. Cunningham JM, Johnson RA, Litzelman K, et al. Telomere length varies by DNA extraction  
148 method: implications for epidemiologic research. *Cancer Epidemiol Biomarkers Prev*  
149 2013;22(11):2047-54.
- 150 5. Raschenberger J, Lamina C, Haun M, et al. Influence of DNA extraction methods on relative  
151 telomere length measurements and its impact on epidemiological studies. *Sci Rep* 2016;6:25398.
- 152 6. Cawthon RM. Telomere length measurement by a novel monochrome multiplex quantitative  
153 PCR method. *Nucleic Acids Res* 2009;37(3):e21.
- 154 7. Cawthon RM. Telomere measurement by quantitative PCR. *Nucleic Acids Res*  
155 2002;30(10):e47.
- 156 8. Pfaffl MW. A new mathematical model for relative quantification in real-time RT-PCR. *Nucleic*  
157 *Acids Res* 2001;29(9):e45.
- 158 9. Ruijter JM, Ramakers C, Hoogaars WM, et al. Amplification efficiency: linking baseline and  
159 bias in the analysis of quantitative PCR data. *Nucleic Acids Res* 2009;37(6):e45.

160
